# Supplementary material for: Enhanced ionic conductivity of protonated antiperovskites via tuning lattice and rotational dynamics
Source: Royal Society of Chemistry journal article supplement (doi:10.1039/d2ta08307h), 2023-01-01
Supplement: d2ta08307h1.pdf [file d2ta08307h1.pdf]

# **Enhanced ionic conductivity of protonated antiperovskite via tuning lattice and rotational dynamics**

*Chaohong Guan, Yu Yang, Runxin Ouyang, Huirong Jing, Jieqiong Yan, Hong Zhu\**

University of Michigan–Shanghai Jiao Tong University Joint Institute, Shanghai Jiao Tong  
University, Shanghai 200240, China

## S1. Predicting the ground state structure of studied electrolytes

### S1.1 Li<sub>2</sub>OHCl

Based on the mentioned in the introduction, the low-temperature phase of Li<sub>2</sub>OHCl is the orthorhombic phase (Amm2 and Pban space groups), the phase transition will occur with the increased temperature ( $> 30\text{ }^{\circ}\text{C}$ ), forming the cubic phase at higher temperature. Hence, in this work, the orthorhombic and cubic phases were considered for the searching of ground state structure.

According to the method shown in reference, firstly, based on the Wyckoff positions of all atoms of Li<sub>2</sub>OHCl reported by Hanghofer et al.[1], we built a 2\*2\*2 supercell (model 1, Pban space group) with the experimental lattice constants. Then, considering the partial occupancy of Li and H atoms, 20000 structures from the parent partially occupied supercell were randomly sampled and their electrostatic energy was calculated, as implemented in the pymatgen code[2]. Then, 20 structures with the lowest electrostatic energy were relaxed by DFT.

Additionally, the similar method was adopted to build the 3\*3\*3 cubic Li<sub>2</sub>OHCl (model 2). We firstly built the Li<sub>3</sub>OCl unit cell by the experiment lattice constants, and the 2/3 partial occupancy was considered to the 3d Li sites in Li<sub>3</sub>OCl. Specially, the H atom were randomly placed 0.98 Å away from each oxygen atom, and 20000 random structures also were built, the electrostatic energy of these structures were calculated and the 20 structures with the lowest electrostatic energy were relaxed by DFT.

The obtained ground state energy for both models are -4.55 and -4.58 eV/atom, respectively, hence, the final ground state structure was based on model 2, and after relaxation, the structure became tetragonal with slight distortion, as shown in Table S1, the result is consistent well with the work of Dawson et al. [3]

Table S1 Lattice parameters of the ground state structure of Li<sub>2</sub>OHCl.

|             | a/Å   | b/Å   | c/Å   | $\alpha/^{\circ}$ | $\beta/^{\circ}$ | $\gamma/^{\circ}$ |
|-------------|-------|-------|-------|-------------------|------------------|-------------------|
| This work   | 3.86  | 3.57  | 3.86  | 90                | 90               | 90                |
| Reference 3 | 3.853 | 3.591 | 3.853 | 90                | 90               | 90                |

### S1.2 Brominated Li<sub>2</sub>OHCl

In this work, the ground state structures of brominated  $\text{Li}_2\text{OHCl}$  were built as follows. Firstly, based on the ground state structure of model 2, the same initial structure was selected to determine the ground state structure of brominated  $\text{Li}_2\text{OHCl}$ . For  $\text{Li}_2\text{OHBr}_{0.1}\text{Cl}_{0.9}$ , 3 of the 27 chlorine atoms in the supercell were replaced by Br in the  $3 \times 3 \times 3$  supercell (containing 135 atoms), which means the  $\text{Li}_{54}(\text{OH})_{27}\text{Br}_3\text{Cl}_{24}$  composition for  $\text{Li}_2\text{OHBr}_{0.1}\text{Cl}_{0.9}$  was simulated. Notably, this substitution will generate 2925 structures with the same electrostatic energies and therefore, the MatErials Graph Network (MEGNet) model [4] was adopted to predict the formation energies of these structures. Then, the 20 structures with the lowest formation energy were relaxed by DFT to obtain the final structure. A similar procedure was adopted to determine the ground state structure of  $\text{Li}_2(\text{OH})_{0.9}\text{Br}_{0.1}\text{Cl}$ , 3 of 27 OH groups were replaced by Br, which means the  $\text{Li}_{54}(\text{OH})_{24}\text{Br}_3\text{Cl}_{27}$  composition was simulated. The obtained ground state structures of  $\text{Li}_2\text{OHBr}_{0.1}\text{Cl}_{0.9}$  and  $\text{Li}_2(\text{OH})_{0.9}\text{Br}_{0.1}\text{Cl}$  are shown in Figure S1a and b, the both structures are pseudo-cubic, and their lattice parameters are listed in Table S2,

Table S2 Lattice parameters of the ground state structure of  $\text{Li}_2\text{OHBr}_{0.1}\text{Cl}_{0.9}$  and  $\text{Li}_2(\text{OH})_{0.9}\text{Br}_{0.1}\text{Cl}$ .

| System                                                 | a/Å  | b/Å  | c/Å  | $\alpha$ | $\beta$ | $\gamma$ |
|--------------------------------------------------------|------|------|------|----------|---------|----------|
| $\text{Li}_2\text{OHBr}_{0.1}\text{Cl}_{0.9}$          | 3.86 | 3.92 | 3.86 | 90.00    | 89.99   | 89.99    |
| $\text{Li}_2(\text{OH})_{0.9}\text{Br}_{0.1}\text{Cl}$ | 3.91 | 3.93 | 3.91 | 89.99    | 90.00   | 90.01    |

## S2. Computational methods

### 2.1 Phase Stability

The compositional stability of  $\text{Li}_2\text{OHCl}$ -based electrolytes was assessed by comparing the normalized ground-state energy to that of all phases in the Li-H-O-Cl-Br compositional space[5] which can be defined as  $E = E_{\text{GS}}/N_{\text{atom}}$ , the  $N_{\text{atom}}$  represents the number of atoms in the crystal. In addition, the phase diagrams were constructed by computing the convex hull for all structures. The stable compositions are located on the hull, the energy of above hull of metastable structure lie above the hull,  $E_{\text{hull}} > 0$ .

### 2.2 Electrochemical Stability

Two approaches were adopted to assess the electrochemical stabilities of the  $\text{Li}_2\text{OHCl}$ -based APs. Firstly, the band gap of each APs was calculated based on the HSE06 hybrid functional.[6] Notably, according to the previous studies, this method provides an upper limit to the electrochemical window.[7, 8] Another approach to assess the stability is based on the grand potential phase diagram (GPPD)[9]. The electrolyte is taken to be an open system to Li and the equilibrium phases formed at the electrode/electrolyte interface for different Li chemical potentials can be computed, and the electrochemical window is the range of Li chemical potential from the critical reduced Li potential to the critical oxidized potential.

### 2.3 Elastic moduli estimation from the elastic tensor

To estimate the elastic moduli (including bulk, B, shear, G, and Young, E, moduli) of our studied APs, the Voigt-Reuss-Hill approximation[10] was adopted to computed the elastic tensor,  $C_{ij}$ , the corresponding calculated process are shown in the following:

$$B_V = \frac{(C_{11} + C_{22} + C_{33}) + 2(C_{12} + C_{23} + C_{31})}{9}$$
$$G_V = \frac{(C_{11} + C_{22} + C_{33}) - (C_{12} + C_{23} + C_{31}) + 3(C_{44} + C_{55} + C_{66})}{15}$$

Then, according the Reuss approximation, the  $B_R$  and  $G_R$  were calculated by the compliance tensor,

$$S_{ij} = C_{ij}^{-1}, \text{ as}$$

$$B_R = \frac{1}{(S_{11} + S_{22} + S_{33}) + 2(S_{12} + S_{23} + S_{31})}$$

$$G_R = \frac{1}{4(S_{11} + S_{22} + S_{33}) - 4(S_{12} + S_{23} + S_{31}) + 3(S_{44} + S_{55} + S_{66})}$$

Therefore, the elastic moduli B and G were obtained:

$$B = \frac{(B_V + B_R)}{2}$$

$$G = \frac{(G_V + G_R)}{2}$$

And the E was estimated as

$$E = \frac{9BG}{(3B + G)}$$

Table S3 Mechanical properties of APs studied in our work.

|     | Li <sub>3</sub> OCl | Li <sub>2</sub> OHCl | Li <sub>2</sub> OHBr <sub>0.1</sub> Cl <sub>0.9</sub> | Li <sub>2</sub> (OH) <sub>0.9</sub> Br <sub>0.1</sub> Cl |
|-----|---------------------|----------------------|-------------------------------------------------------|----------------------------------------------------------|
| B   | 48.21               | 34.61                | 40.25                                                 | 42.6                                                     |
| E   | 86.53               | 54.44                | 55.15                                                 | 53.93                                                    |
| G   | 36.03               | 21.99                | 21.69                                                 | 20.92                                                    |
| G/B | 0.75                | 0.64                 | 0.53                                                  | 0.49                                                     |

Table S4 The detailed data of total elastic moduli for studied structures (Gpa).

|                                                          | C11   | C22  | C33   | C12  | C23  | C31  | C44  | C55  | C66  |
|----------------------------------------------------------|-------|------|-------|------|------|------|------|------|------|
| Li <sub>2</sub> OHCl                                     | 107.2 | 65.1 | 106   | 39   | 37.7 | 68.8 | 34.5 | 35   | 54.7 |
| Li <sub>2</sub> OHBr <sub>0.1</sub> Cl <sub>0.9</sub>    | 105   | 62.4 | 104.2 | 56.8 | 53.4 | 82.2 | 43.4 | 44.8 | 63.7 |
| Li <sub>2</sub> (OH) <sub>0.9</sub> Br <sub>0.1</sub> Cl | 106.7 | 63.5 | 104.2 | 61.4 | 59.3 | 87.7 | 44.7 | 44.2 | 62.2 |

## 2.4 Bader charge analysis

In this work, the bader charge analysis was calculated to study the charge distribution and ionicity of these Li<sub>2</sub>OHCl-based solid state electrolytes. The average Bader charges of different atoms for Li<sub>2</sub>OHCl, Li<sub>2</sub>OHBr<sub>0.1</sub>Cl<sub>0.9</sub> and Li<sub>2</sub>(OH)<sub>0.9</sub>Br<sub>0.1</sub>Cl are shown in Table S5.

Table S5 Bader charges of Li<sub>2</sub>OHCl, Li<sub>2</sub>OHBr<sub>0.1</sub>Cl<sub>0.9</sub> and Li<sub>2</sub>(OH)<sub>0.9</sub>Br<sub>0.1</sub>Cl.

|    | Li <sub>2</sub> OHCl | Li <sub>2</sub> OHBr <sub>0.1</sub> Cl <sub>0.9</sub> | Li <sub>2</sub> (OH) <sub>0.9</sub> Br <sub>0.1</sub> Cl |
|----|----------------------|-------------------------------------------------------|----------------------------------------------------------|
| Li | 0.86                 | 0.86                                                  | 0.86                                                     |

|    |       |       |       |
|----|-------|-------|-------|
| H  | 0.54  | 0.55  | 0.56  |
| Cl | -0.85 | -0.84 | -0.84 |
| O  | -1.41 | -1.43 | -1.45 |
| Br |       | -0.81 | -0.80 |

## 2.5 Ab initio molecular dynamics simulation (AIMD)

Ab initio molecular dynamics (AIMD), initialized from the lowest-energy atomic configurations, was used to investigate the ionic conductivity. All AIMD simulations (Li vacancies are created) are performed in an NVT ensemble with a timestep of 2 fs and using a Nosé–Hoover thermostat[11] for a period of 80ps. A minimal  $\Gamma$ -point-only k-point grid was used with spin-polarized calculations. The AIMD simulations were run at 800, 900, 1000, 1100 and 1200 K. All the data were fitted assuming Arrhenius behavior to obtain the activation energy and ionic conductivity at 373 K. To gain insight into the diffusion mechanism, the AIMD trajectories were analyzed to identify the Li jumps and the time scale of the OH reorientations. Details about the method are given in the following. The mean-square displacement (MSD) of the Li ions was estimated from[12]

$$MSD_{Li}(t) = \frac{1}{N} \sum_{i=1}^N |r_i(t + t_0) - r_i(t_0)|^2$$

According to the MSD, the self-diffusion coefficient was estimated using

$$D_{Li} = \frac{MSD_{Li}}{6t} = D_{Li}^0 \exp\left(-\frac{E_a}{k_B T}\right)$$

Where  $D_{Li}^0$  is a pre-factor,  $k_B$  is the Boltzmann's constant, T is the simulation temperature in K, and  $E_a$  is the activation energy. Following, the temperature-dependent ionic conductivity,  $\sigma_{Li}(T)$ , was estimated from the Nernst-Einstein relation[13] as

$$\sigma_{Li}(T) = \frac{(Z_{Li}e)^2 N D_{Li}}{V k_B T}$$

Where  $Z_{Li}$  is the integer charge of a Li ion and V is the volume of the simulation box. The MSD and the pair radial distribution function was calculated by pymatgenn diffusion package[2].

### S3. The decomposition reactions of SSEs with lithium metal

#### S3.1 Decomposition reactions of Li<sub>2</sub>OHCl with lithium metal

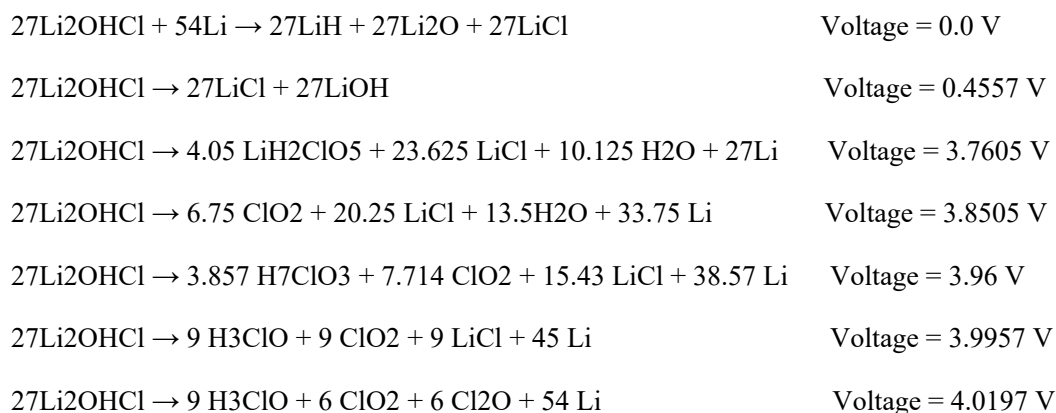

#### S3.2 Decomposition reactions of Li<sub>2</sub>(OH)<sub>0.9</sub>Br<sub>0.1</sub>Cl with lithium metal

Because the bulk of Li<sub>2</sub>(OH)<sub>0.9</sub>Br<sub>0.1</sub>Cl is  $3 \times 3 \times 3$  supercell, hence:

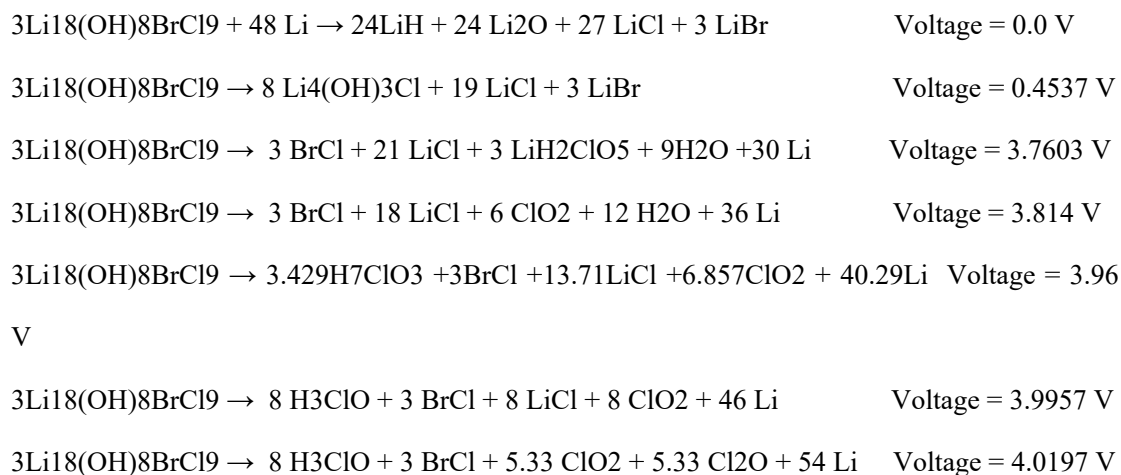

#### S3.3 Decomposition reactions of Li<sub>2</sub>(OH)<sub>0.9</sub>Br<sub>0.1</sub>Cl with lithium metal

Because the bulk of Li<sub>2</sub>OHBr<sub>0.1</sub>Cl<sub>0.9</sub> is  $3 \times 3 \times 3$  supercell, hence:

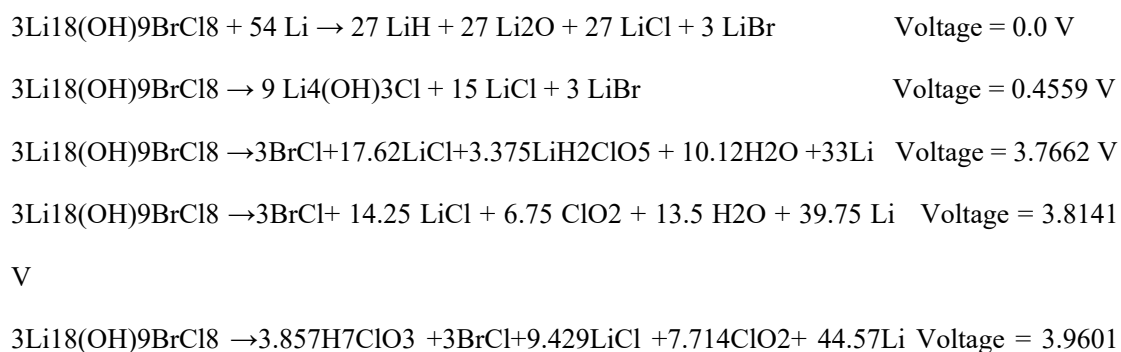

V

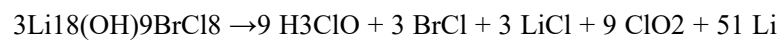

Voltage = 3.9957

V

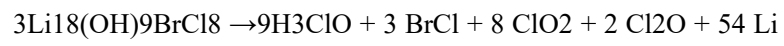

Voltage = 4.0197

V

#### S4. Analysis of the trajectories from the AIMD simulations

Firstly, the lithium atoms in the studied APs can be labeled as shown in Figure S10a, it is noted that the label is the nearest-neighbor site. Considering the situation for the exist of 1/3 Li vacancies in the  $\text{Li}_2\text{OHCl}$ -based electrolytes, we drew a lattice of 9 available Li sites and 6 Li ions. The 6 Li ions occupy 6 sites of the total 9 sites. During the label process, the distance ( $d$ ) between Li ion and Li sites was estimated. The site,  $d$  s that has an ion closest to it will be given the label specific to that ion. denotes the label of the  $L_s^j$  Li ion assigned to the site at the time instant  $j$ . The length of the  $L_s^j$  vector (for  $j$  fixed) is 81 for the studied electrolytes as the defect-free  $\text{Li}_3\text{OCl}$  lattice has 81 available Li sites in the  $3 \times 3 \times 3$  supercell. Thus,  $L_s^j \in [14...54]$  since 54 ions are present and  $L_{s=0}^j$  are the unoccupied sites. The method also was adopted by the previous studied.

Then, to count the Li hops, the  $m = |L_s^{j+1} - L_s^j|$  has been calculated, as shown in Figure S6b and c, if the  $m$  does not equal to 0, the Li jump occurred. And when  $m = 2$  indicates that a single Li ion hops between two vacant sites. Detailly, we note that the solid-line arrow in the left-hand part of Figure S5b shows an event where one Li ion (No.2) jumps from an occupied site (No.5) to a vacant site (No. 8). We note that two labels (L5 and L8) changed. Similarly, if two Li ions jump from two occupied sites to two vacant sites, there will be a change of 4 labels. Therefore, an even number of labels change ( $m=4$ ) can represent a mode of jumps where Li ions move from occupied sites to vacant sites. The number of atoms jumping during such an event is  $n = m/2$ , can be called: individual hopping.

Besides the individual hop, the concurrent hop will also been considered in this work, seeing the dashed arrow in the Figure S6b, when Li ion No.2 occupies the vacant site No.8, site 5 is vacant and No.5 Li ion jumps to occupy it, leaving its site (No.2). The occurrence of the event represented by the dashed-line arrow depends on the occurrence of the event represented by the solid-line arrow. In addition, we quantified the number of jumps occurring at each Li site within

the lattice. In this case, the  $\sum_{j=0}^T (|L_s^{j+1} - L_s^j| \neq 0)$  was calculated for each  $s$ , where  $T$  is the total number of steps analyzed.

In addition, the orientational correlation function was calculated to analyze the timescales of

OH groups reorientation of the studied APs [15]:

$$C_n(t) = \langle \rho[P_n(u(0) \cdot u(t))] \rangle$$

Where  $\rho$  is the autocorrelation,  $P_n$  is the  $n^{\text{th}}$  order Legendre's polynomial,  $u(0) \cdot u(t)$  is the argument of the polynomial where  $u(t)$  is the unit vector at time  $t$ .

## S5. The coordinates of our studied structures

| Li2OHCl                   |     |       |       | Li <sub>2</sub> (OH) <sub>0.9</sub> Br <sub>0.1</sub> Cl |       |       |       | Li <sub>2</sub> OHBr <sub>0.1</sub> Cl <sub>0.9</sub> |       |       |       |
|---------------------------|-----|-------|-------|----------------------------------------------------------|-------|-------|-------|-------------------------------------------------------|-------|-------|-------|
| a/Å    b/Å    c/Å         |     |       |       | a/Å    b/Å    c/Å                                        |       |       |       | a/Å    b/Å    c/Å                                     |       |       |       |
| 3.86    3.57    3.86      |     |       |       | 11.73    11.79    11.73                                  |       |       |       | 11.58    11.76    11.58                               |       |       |       |
| $\alpha$ $\beta$ $\gamma$ |     |       |       | $\alpha$ $\beta$ $\gamma$                                |       |       |       | $\alpha$ $\beta$ $\gamma$                             |       |       |       |
| 90°    90°    90°         |     |       |       | 89.99    90.00    90.01                                  |       |       |       | 90.00    89.99    89.99                               |       |       |       |
|                           | x   | y     | z     |                                                          | x     | y     | z     |                                                       | x     | y     | z     |
| Li1                       | 1.0 | 0.443 | 0.500 | Li1                                                      | 0.329 | 0.152 | 0.170 | Li1                                                   | 0.333 | 0.141 | 0.166 |
| Li2                       | 0.5 | 0.440 | 0     | Li2                                                      | 0.329 | 0.152 | 0.494 | Li2                                                   | 0.333 | 0.149 | 0.497 |
| Cl1                       | 1.0 | 0.530 | 0.5   | Li3                                                      | 0.310 | 0.118 | 0.835 | Li3                                                   | 0.333 | 0.150 | 0.837 |
| O1                        | 0.5 | 0.53  | 0.5   | Li4                                                      | 0.353 | 0.462 | 0.170 | Li4                                                   | 0.333 | 0.474 | 0.166 |
| H1                        | 0.5 | 0.804 | 0.5   | Li5                                                      | 0.335 | 0.488 | 0.503 | Li5                                                   | 0.333 | 0.476 | 0.501 |
|                           |     |       |       | Li6                                                      | 0.337 | 0.467 | 0.829 | Li6                                                   | 0.334 | 0.475 | 0.833 |
|                           |     |       |       | Li7                                                      | 0.333 | 0.791 | 0.165 | Li7                                                   | 0.334 | 0.809 | 0.167 |
|                           |     |       |       | Li8                                                      | 0.336 | 0.813 | 0.502 | Li8                                                   | 0.333 | 0.808 | 0.500 |
|                           |     |       |       | Li9                                                      | 0.335 | 0.811 | 0.835 | Li9                                                   | 0.334 | 0.807 | 0.833 |
|                           |     |       |       | Li10                                                     | 0.669 | 0.154 | 0.169 | Li10                                                  | 0.667 | 0.141 | 0.167 |
|                           |     |       |       | Li11                                                     | 0.670 | 0.134 | 0.496 | Li11                                                  | 0.667 | 0.141 | 0.500 |
|                           |     |       |       | Li12                                                     | 0.687 | 0.129 | 0.837 | Li12                                                  | 0.667 | 0.142 | 0.834 |
|                           |     |       |       | Li13                                                     | 0.669 | 0.480 | 0.169 | Li13                                                  | 0.666 | 0.482 | 0.163 |
|                           |     |       |       | Li14                                                     | 0.668 | 0.478 | 0.502 | Li14                                                  | 0.667 | 0.483 | 0.504 |
|                           |     |       |       | Li15                                                     | 0.666 | 0.458 | 0.831 | Li15                                                  | 0.666 | 0.475 | 0.833 |
|                           |     |       |       | Li16                                                     | 0.663 | 0.819 | 0.161 | Li16                                                  | 0.667 | 0.809 | 0.168 |
|                           |     |       |       | Li17                                                     | 0.643 | 0.784 | 0.502 | Li17                                                  | 0.667 | 0.809 | 0.500 |
|                           |     |       |       | Li18                                                     | 0.662 | 0.819 | 0.837 | Li18                                                  | 0.667 | 0.807 | 0.833 |
|                           |     |       |       | Li19                                                     | 0.002 | 0.145 | 0.169 | Li19                                                  | 0.000 | 0.142 | 0.166 |
|                           |     |       |       | Li20                                                     | 1.000 | 0.124 | 0.498 | Li20                                                  | 0.000 | 0.141 | 0.500 |
|                           |     |       |       | Li21                                                     | 0.003 | 0.147 | 0.835 | Li21                                                  | 0.000 | 0.143 | 0.834 |
|                           |     |       |       | Li22                                                     | 0.977 | 0.451 | 0.168 | Li22                                                  | 0.000 | 0.474 | 0.166 |
|                           |     |       |       | Li23                                                     | 0.996 | 0.485 | 0.503 | Li23                                                  | 0.000 | 0.476 | 0.501 |
|                           |     |       |       | Li24                                                     | 0.996 | 0.486 | 0.827 | Li24                                                  | 0.000 | 0.475 | 0.833 |
|                           |     |       |       | Li25                                                     | 0.004 | 0.801 | 0.163 | Li25                                                  | 1.000 | 0.817 | 0.170 |
|                           |     |       |       | Li26                                                     | 0.020 | 0.796 | 0.503 | Li26                                                  | 1.000 | 0.808 | 0.500 |
|                           |     |       |       | Li27                                                     | 0.002 | 0.821 | 0.836 | Li27                                                  | 1.000 | 0.815 | 0.830 |
|                           |     |       |       | Li28                                                     | 0.163 | 0.152 | 0.005 | Li28                                                  | 0.166 | 0.143 | 0.000 |
|                           |     |       |       | Li29                                                     | 0.165 | 0.145 | 0.332 | Li29                                                  | 0.166 | 0.142 | 0.333 |
|                           |     |       |       | Li30                                                     | 0.164 | 0.154 | 0.665 | Li30                                                  | 0.163 | 0.150 | 0.667 |
|                           |     |       |       | Li31                                                     | 0.163 | 0.462 | 0.980 | Li31                                                  | 0.167 | 0.475 | 0.000 |
|                           |     |       |       | Li32                                                     | 0.165 | 0.451 | 0.357 | Li32                                                  | 0.167 | 0.475 | 0.334 |
|                           |     |       |       | Li33                                                     | 0.165 | 0.480 | 0.664 | Li33                                                  | 0.167 | 0.475 | 0.667 |
|                           |     |       |       | Li34                                                     | 0.169 | 0.791 | 0.000 | Li34                                                  | 0.170 | 0.815 | 0.000 |
|                           |     |       |       | Li35                                                     | 0.171 | 0.801 | 0.330 | Li35                                                  | 0.167 | 0.807 | 0.333 |
|                           |     |       |       | Li36                                                     | 0.173 | 0.819 | 0.671 | Li36                                                  | 0.167 | 0.807 | 0.666 |
|                           |     |       |       | Li37                                                     | 0.498 | 0.118 | 0.023 | Li37                                                  | 0.500 | 0.141 | 0.000 |
|                           |     |       |       | Li38                                                     | 0.498 | 0.147 | 0.331 | Li38                                                  | 0.500 | 0.141 | 0.333 |
|                           |     |       |       | Li39                                                     | 0.497 | 0.129 | 0.647 | Li39                                                  | 0.503 | 0.149 | 0.667 |
|                           |     |       |       | Li40                                                     | 0.504 | 0.467 | 0.996 | Li40                                                  | 0.499 | 0.476 | 0.000 |
|                           |     |       |       | Li41                                                     | 0.506 | 0.486 | 0.337 | Li41                                                  | 0.497 | 0.483 | 0.334 |
|                           |     |       |       | Li42                                                     | 0.502 | 0.458 | 0.667 | Li42                                                  | 0.499 | 0.476 | 0.667 |
|                           |     |       |       | Li43                                                     | 0.498 | 0.811 | 0.998 | Li43                                                  | 0.500 | 0.808 | 0.000 |
|                           |     |       |       | Li44                                                     | 0.497 | 0.821 | 0.331 | Li44                                                  | 0.500 | 0.809 | 0.333 |
|                           |     |       |       | Li45                                                     | 0.497 | 0.819 | 0.671 | Li45                                                  | 0.500 | 0.808 | 0.667 |
|                           |     |       |       | Li46                                                     | 0.839 | 0.152 | 0.004 | Li46                                                  | 0.834 | 0.142 | 0.000 |
|                           |     |       |       | Li47                                                     | 0.836 | 0.124 | 0.334 | Li47                                                  | 0.834 | 0.141 | 0.333 |
|                           |     |       |       | Li48                                                     | 0.837 | 0.134 | 0.663 | Li48                                                  | 0.834 | 0.141 | 0.667 |
|                           |     |       |       | Li49                                                     | 0.831 | 0.488 | 0.998 | Li49                                                  | 0.834 | 0.474 | 0.000 |
|                           |     |       |       | Li50                                                     | 0.830 | 0.485 | 0.338 | Li50                                                  | 0.837 | 0.482 | 0.334 |
|                           |     |       |       | Li51                                                     | 0.831 | 0.478 | 0.665 | Li51                                                  | 0.834 | 0.474 | 0.667 |
|                           |     |       |       | Li52                                                     | 0.831 | 0.813 | 0.997 | Li52                                                  | 0.830 | 0.817 | 0.000 |

|  |  |  |  |      |       |       |       |      |       |       |       |
|--|--|--|--|------|-------|-------|-------|------|-------|-------|-------|
|  |  |  |  | Li53 | 0.830 | 0.796 | 0.313 | Li53 | 0.833 | 0.809 | 0.333 |
|  |  |  |  | Li54 | 0.832 | 0.784 | 0.690 | Li54 | 0.833 | 0.809 | 0.666 |
|  |  |  |  | H1   | 0.167 | 0.272 | 0.166 | H1   | 0.167 | 0.262 | 0.167 |
|  |  |  |  | H2   | 0.154 | 0.261 | 0.499 | H2   | 0.164 | 0.264 | 0.497 |
|  |  |  |  | H3   | 0.176 | 0.265 | 0.834 | H3   | 0.164 | 0.265 | 0.836 |
|  |  |  |  | H4   | 0.166 | 0.598 | 0.491 | H4   | 0.167 | 0.593 | 0.167 |
|  |  |  |  | H5   | 0.174 | 0.593 | 0.830 | H5   | 0.166 | 0.596 | 0.500 |
|  |  |  |  | H6   | 0.172 | 0.917 | 0.161 | H6   | 0.167 | 0.593 | 0.833 |
|  |  |  |  | H7   | 0.170 | 0.926 | 0.493 | H7   | 0.170 | 0.931 | 0.170 |
|  |  |  |  | H8   | 0.167 | 0.928 | 0.846 | H8   | 0.167 | 0.926 | 0.500 |
|  |  |  |  | H9   | 0.500 | 0.265 | 0.157 | H9   | 0.169 | 0.928 | 0.831 |
|  |  |  |  | H10  | 0.507 | 0.259 | 0.497 | H10  | 0.500 | 0.259 | 0.166 |
|  |  |  |  | H11  | 0.503 | 0.593 | 0.159 | H11  | 0.502 | 0.262 | 0.498 |
|  |  |  |  | H12  | 0.501 | 0.594 | 0.513 | H12  | 0.503 | 0.264 | 0.836 |
|  |  |  |  | H13  | 0.505 | 0.583 | 0.828 | H13  | 0.497 | 0.597 | 0.164 |
|  |  |  |  | H14  | 0.487 | 0.928 | 0.166 | H14  | 0.497 | 0.598 | 0.503 |
|  |  |  |  | H15  | 0.509 | 0.932 | 0.500 | H15  | 0.500 | 0.596 | 0.834 |
|  |  |  |  | H16  | 0.500 | 0.939 | 0.833 | H16  | 0.500 | 0.929 | 0.167 |
|  |  |  |  | H17  | 0.834 | 0.261 | 0.179 | H17  | 0.500 | 0.926 | 0.500 |
|  |  |  |  | H18  | 0.839 | 0.250 | 0.495 | H18  | 0.500 | 0.926 | 0.833 |
|  |  |  |  | H19  | 0.836 | 0.259 | 0.826 | H19  | 0.833 | 0.260 | 0.167 |
|  |  |  |  | H20  | 0.843 | 0.598 | 0.167 | H20  | 0.834 | 0.259 | 0.500 |
|  |  |  |  | H21  | 0.834 | 0.606 | 0.500 | H21  | 0.833 | 0.262 | 0.834 |
|  |  |  |  | H22  | 0.821 | 0.594 | 0.833 | H22  | 0.836 | 0.595 | 0.164 |
|  |  |  |  | H23  | 0.841 | 0.926 | 0.164 | H23  | 0.836 | 0.597 | 0.503 |
|  |  |  |  | H24  | 0.833 | 0.932 | 0.824 | H24  | 0.833 | 0.593 | 0.833 |
|  |  |  |  | Br1  | 0.162 | 0.543 | 0.171 | H25  | 0.831 | 0.931 | 0.169 |
|  |  |  |  | Br2  | 0.496 | 0.210 | 0.838 | H26  | 0.833 | 0.929 | 0.500 |
|  |  |  |  | Br3  | 0.829 | 0.876 | 0.504 | H27  | 0.830 | 0.931 | 0.830 |
|  |  |  |  | Cl1  | 0.324 | 0.017 | 0.009 | Br1  | 0.333 | 0.008 | 0.667 |
|  |  |  |  | Cl2  | 0.331 | 0.022 | 0.332 | Br2  | 0.666 | 0.342 | 0.334 |
|  |  |  |  | Cl3  | 0.327 | 0.018 | 0.661 | Br3  | 1.000 | 0.675 | 0.000 |
|  |  |  |  | Cl4  | 0.326 | 0.353 | 0.007 | Cl1  | 0.332 | 0.017 | 0.001 |
|  |  |  |  | Cl5  | 0.339 | 0.351 | 0.340 | Cl2  | 0.333 | 0.017 | 0.334 |
|  |  |  |  | Cl6  | 0.322 | 0.353 | 0.655 | Cl3  | 0.334 | 0.349 | 0.000 |
|  |  |  |  | Cl7  | 0.344 | 0.682 | 0.989 | Cl4  | 0.334 | 0.350 | 0.334 |
|  |  |  |  | Cl8  | 0.345 | 0.687 | 0.344 | Cl5  | 0.334 | 0.349 | 0.666 |
|  |  |  |  | Cl9  | 0.335 | 0.689 | 0.669 | Cl6  | 0.333 | 0.684 | 0.001 |
|  |  |  |  | Cl10 | 0.672 | 0.018 | 0.007 | Cl7  | 0.334 | 0.683 | 0.333 |
|  |  |  |  | Cl11 | 0.656 | 0.020 | 0.322 | Cl8  | 0.333 | 0.681 | 0.667 |
|  |  |  |  | Cl12 | 0.659 | 0.020 | 0.674 | Cl9  | 0.667 | 0.016 | 0.000 |
|  |  |  |  | Cl13 | 0.678 | 0.353 | 0.011 | Cl10 | 0.667 | 0.014 | 0.333 |
|  |  |  |  | Cl14 | 0.669 | 0.356 | 0.336 | Cl11 | 0.666 | 0.017 | 0.667 |
|  |  |  |  | Cl15 | 0.678 | 0.349 | 0.656 | Cl12 | 0.666 | 0.351 | 0.000 |
|  |  |  |  | Cl16 | 0.664 | 0.689 | 0.998 | Cl13 | 0.666 | 0.350 | 0.666 |
|  |  |  |  | Cl17 | 0.660 | 0.685 | 0.328 | Cl14 | 0.667 | 0.684 | 0.001 |
|  |  |  |  | Cl18 | 0.657 | 0.683 | 0.676 | Cl15 | 0.667 | 0.682 | 0.333 |
|  |  |  |  | Cl19 | 0.002 | 0.022 | 0.002 | Cl16 | 0.667 | 0.683 | 0.666 |
|  |  |  |  | Cl20 | 0.011 | 0.015 | 0.322 | Cl17 | 0.000 | 0.015 | 0.000 |
|  |  |  |  | Cl21 | 0.012 | 0.020 | 0.678 | Cl18 | 0.000 | 0.016 | 0.333 |
|  |  |  |  | Cl22 | 0.993 | 0.351 | 0.994 | Cl19 | 0.001 | 0.017 | 0.668 |
|  |  |  |  | Cl23 | 0.991 | 0.350 | 0.343 | Cl20 | 0.000 | 0.348 | 0.000 |
|  |  |  |  | Cl24 | 0.998 | 0.356 | 0.665 | Cl21 | 0.000 | 0.351 | 0.334 |
|  |  |  |  | Cl25 | 0.989 | 0.687 | 0.988 | Cl22 | 0.000 | 0.349 | 0.666 |
|  |  |  |  | Cl26 | 0.993 | 0.687 | 0.341 | Cl23 | 0.999 | 0.684 | 0.333 |
|  |  |  |  | Cl27 | 0.006 | 0.685 | 0.673 | Cl24 | 0.001 | 0.684 | 0.667 |
|  |  |  |  | O1   | 0.165 | 0.190 | 0.169 | H1   | 0.166 | 0.180 | 0.167 |
|  |  |  |  | O2   | 0.162 | 0.179 | 0.497 | H2   | 0.165 | 0.182 | 0.499 |
|  |  |  |  | O3   | 0.165 | 0.183 | 0.836 | H3   | 0.166 | 0.182 | 0.834 |
|  |  |  |  | O4   | 0.164 | 0.517 | 0.502 | H4   | 0.168 | 0.510 | 0.168 |
|  |  |  |  | O5   | 0.168 | 0.511 | 0.827 | H5   | 0.167 | 0.513 | 0.500 |

[illegible]

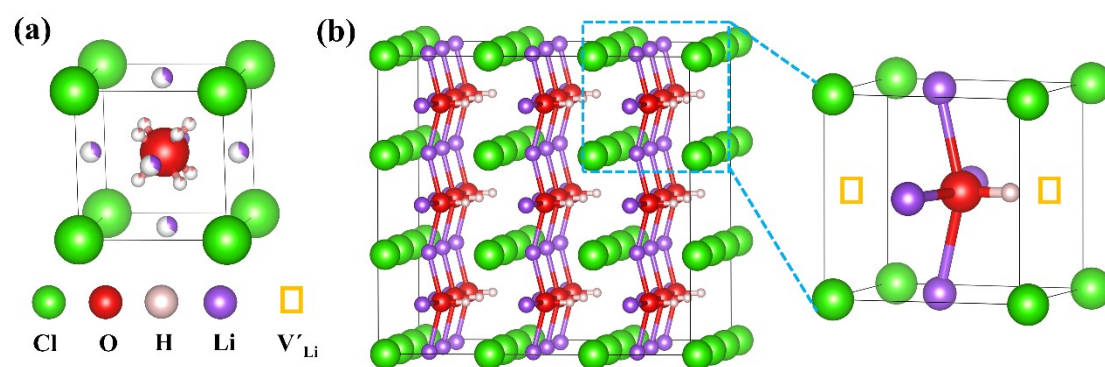

Figure S1. (a) The unrelaxed cubic phase of  $\text{Li}_2\text{OHCl}$  and (b) the relaxed ground-state structure of  $\text{Li}_2\text{OHCl}$ .

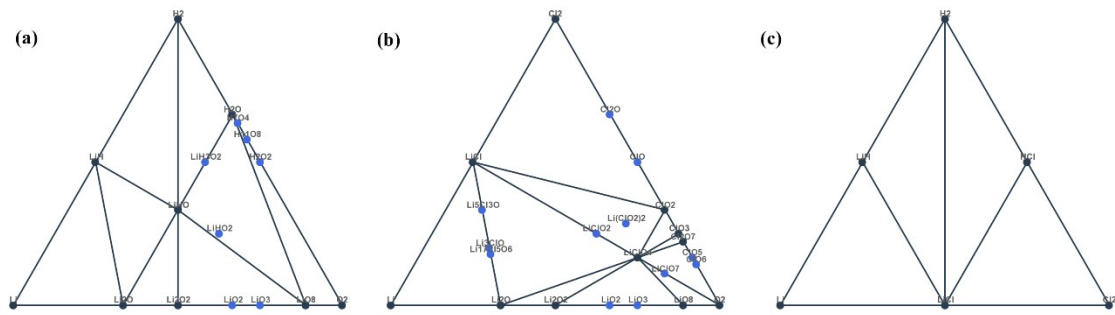

Figure S2. The phase diagram of the precursors adopted in the synthesis of protonated anti-perovskite ( $\text{Li}_2\text{OHCl}$ ), the results are generated by Material Project[16].

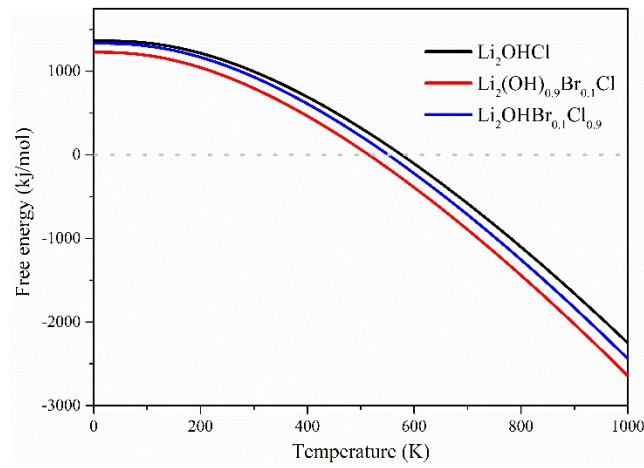

Figure S3. Helmholtz free energies by the vibrational entropy for  $\text{Li}_2\text{OHCl}$ ,  $\text{Li}_2(\text{OH})_{0.9}\text{Br}_{0.1}\text{Cl}$  and  $\text{Li}_2\text{OHBr}_{0.1}\text{Cl}_{0.9}$ .

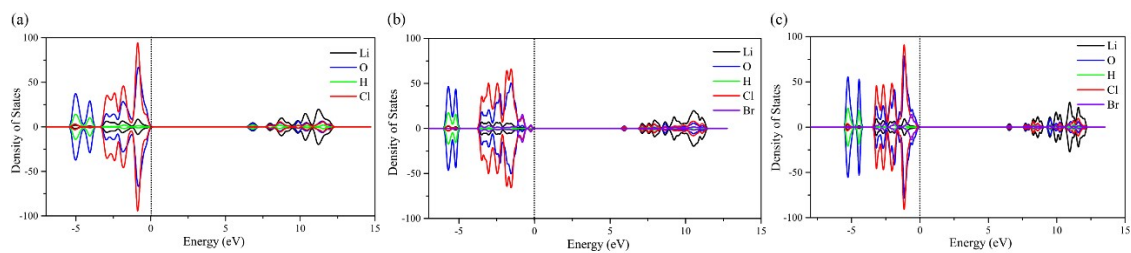

Figure S4. The partial density of states (pdos) for (a)  $\text{Li}_2\text{OHCl}$ , (b)  $\text{Li}_2(\text{OH})_{0.9}\text{Br}_{0.1}\text{Cl}$  and (c)  $\text{Li}_2\text{OHBr}_{0.1}\text{Cl}_{0.9}$ , black, blue, green, red and purple lines represent the pdos of lithium, oxygen, hydrogen, chlorine elements, respectively.

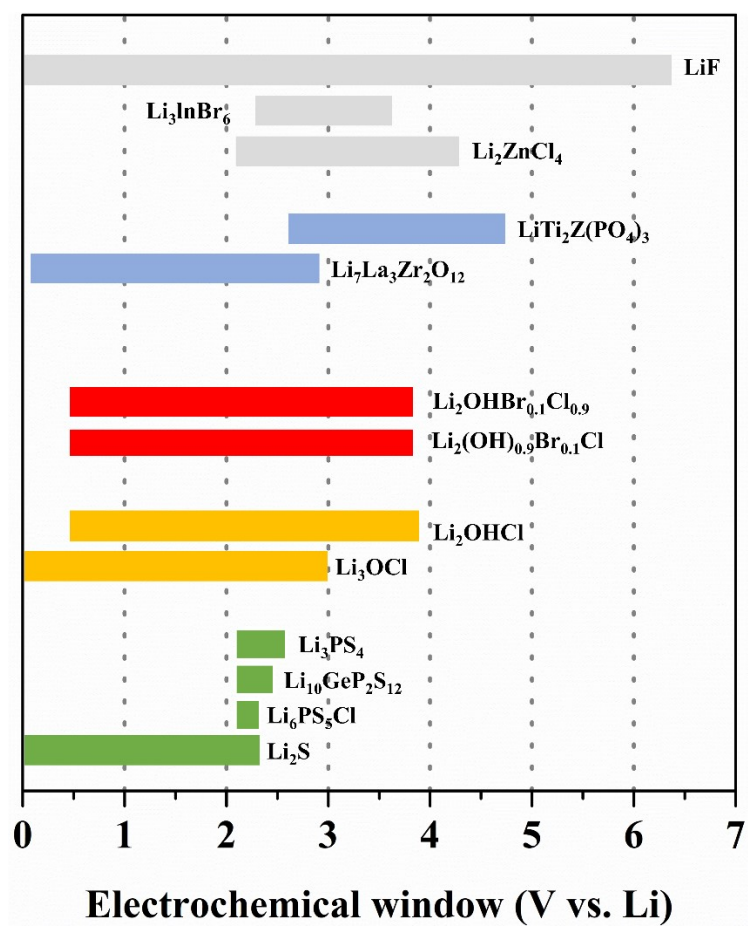

Figure S5. The electrochemical windows of normal solid state electrolytes.

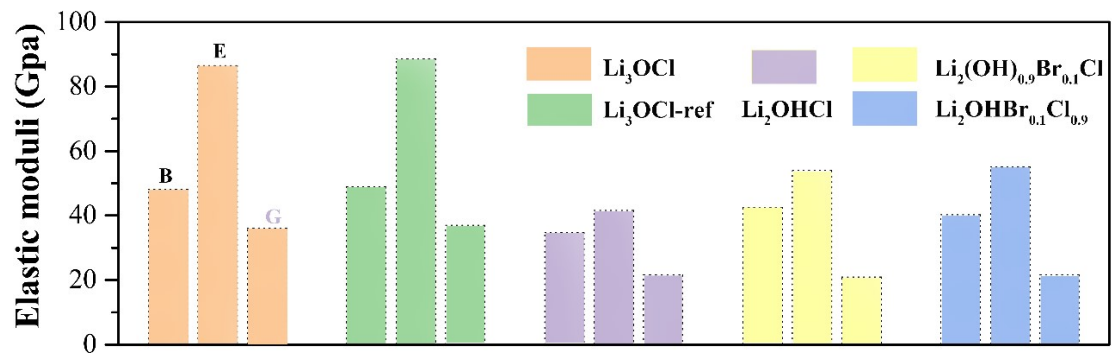

Figure S6. The calculated B, E and G for  $\text{Li}_3\text{OCl}$ ,  $\text{Li}_2\text{OHCl}$ ,  $\text{Li}_2(\text{OH})_{0.9}\text{Br}_{0.1}\text{Cl}$  and  $\text{Li}_2\text{OHBr}_{0.1}\text{Cl}_{0.9}$ , respectively. The  $\text{Li}_3\text{OCl-ref}$  represents the values reported by reference of 36.

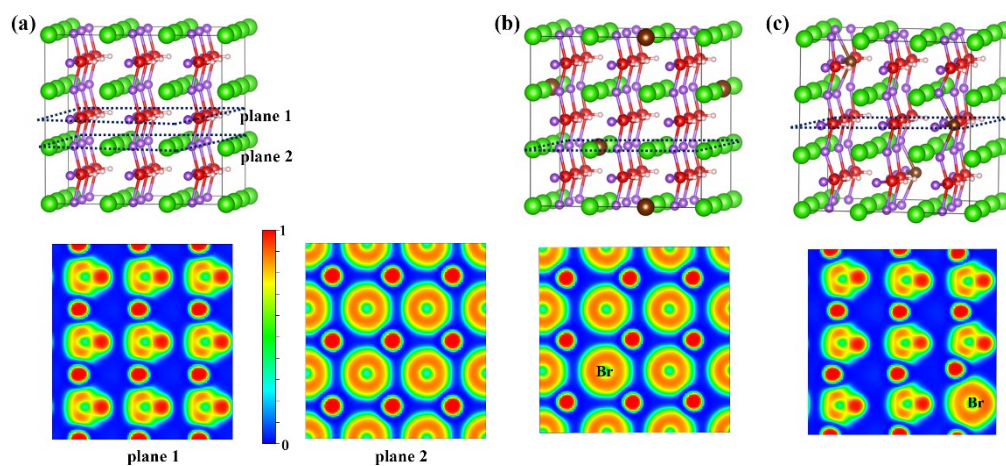

Figure S7. The electron localization function (ELF) of (a)  $\text{Li}_2\text{OHCl}$ , (b)  $\text{Li}_2\text{OHBr}_{0.1}\text{Cl}_{0.9}$  and (c)  $\text{Li}_2(\text{OH})_{0.9}\text{Br}_{0.1}\text{Cl}$ , the black frame represents the corresponding plane for the ELF.

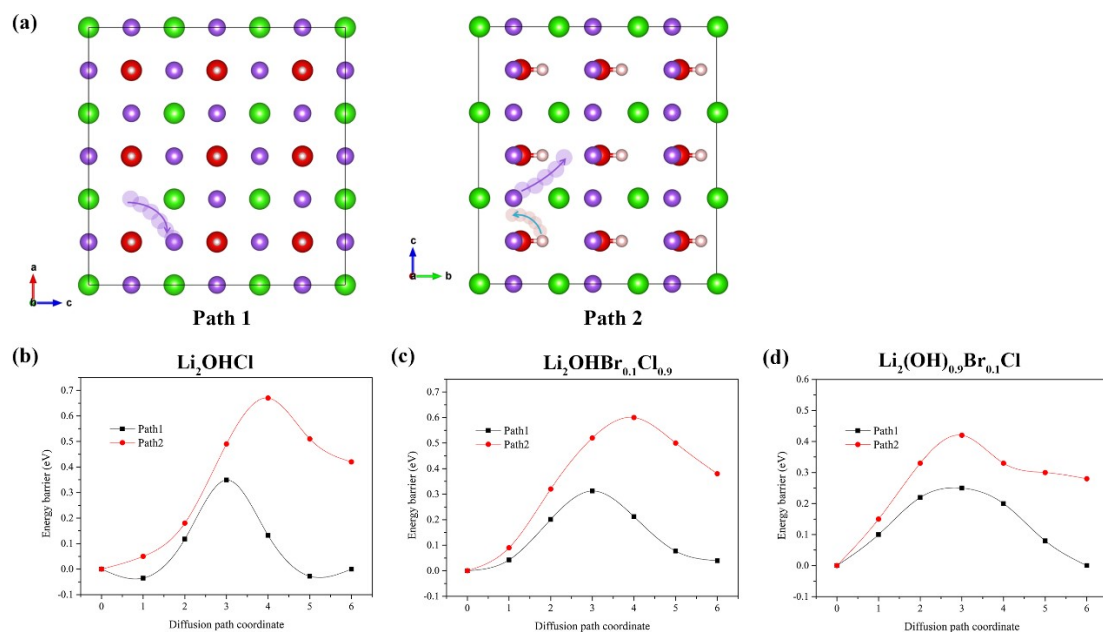

Figure S8. (a) The diffusion paths for neb calculations. (b-d) represents the corresponding diffusion barriers for  $\text{Li}_2\text{OHCl}$ ,  $\text{Li}_2\text{OHBr}_{0.1}\text{Cl}_{0.9}$  and  $\text{Li}_2(\text{OH})_{0.9}\text{Br}_{0.1}\text{Cl}$  along path1 and path2, respectively.

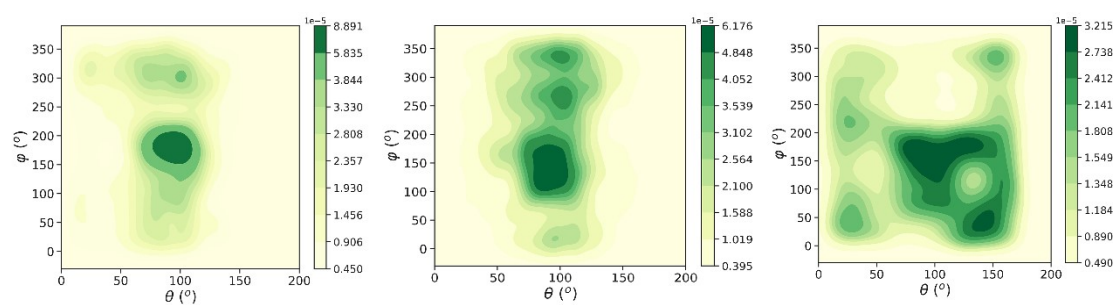

Figure S9. 2D projected probability distribution of H ligand bonded to O, representing the  $\text{Li}_2\text{OHCl}$ ,  $\text{Li}_2\text{OHBr}_{0.1}\text{Cl}_{0.9}$  and  $\text{Li}_2(\text{OH})_{0.9}\text{Br}_{0.1}\text{Cl}$ , respectively. Definition of the angles  $\theta$  and  $\Phi$  in the reference frame of the crystal lattice, with  $\theta$  defined as the angle between the O–H bond and z axis and the angle  $\Phi$  corresponding to the angle between the x axis and the projection of the O–H vector in the xy plane.

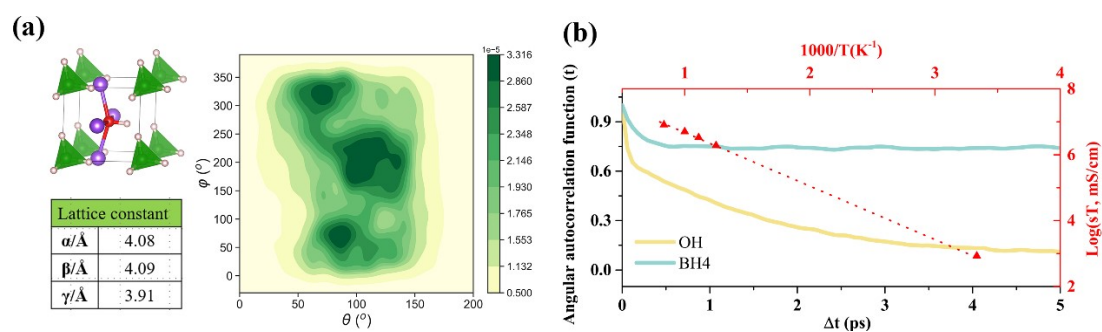

Figure S10. (a) The optimized structure and the corresponding lattice constant of the novel SSE. The right plane shows the 2D projected probability distribution of H ligand bonded to O. (b) displays the angular autocorrelation function for OH, BH<sub>4</sub> groups and the derived Arrhenius plot of the novel SSE. (red line).

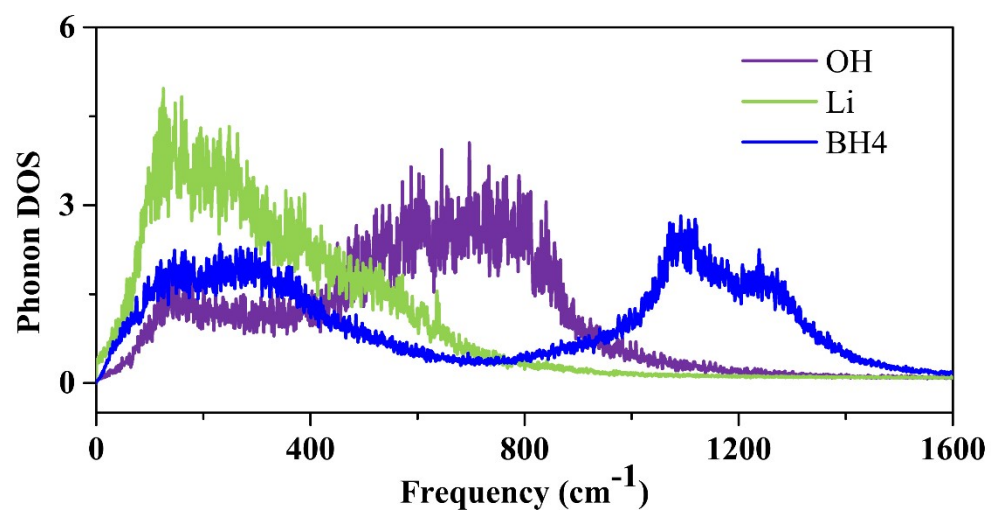

Figure S11. The vibrational spectrum (phonon DOS) of OH, Li and BH<sub>4</sub> in Li<sub>2</sub>OHBH<sub>4</sub> during AIMD simulation.



## References

- [1] I. Hanghofer, G.J. Redhammer, S. Rohde, I. Hanzu, A. Senyshyn, H.M.R. Wilkening, D. Rettenwander, Untangling the Structure and Dynamics of Lithium-Rich Anti-Perovskites Envisaged as Solid Electrolytes for Batteries, *Chemistry of Materials*, 30 (2018) 8134-8144.
- [2] S.P. Ong, W.D. Richards, A. Jain, G. Hautier, M. Kocher, S. Cholia, D. Gunter, V.L. Chevrier, K.A. Persson, G. Ceder, Python Materials Genomics (pymatgen): A robust, open-source python library for materials analysis, *Computational Materials Science*, 68 (2013) 314-319.
- [3] J.A. Dawson, T.S. Attari, H. Chen, S.P. Emge, K.E. Johnston, M.S. Islam, Elucidating lithium-ion and proton dynamics in anti-perovskite solid electrolytes, *Energy & Environmental Science*, 11 (2018) 2993-3002.
- [4] C. Chen, W. Ye, Y. Zuo, C. Zheng, S.P. Ong, Graph Networks as a Universal Machine Learning Framework for Molecules and Crystals, *Chemistry of Materials*, 31 (2019) 3564-3572.
- [5] L.W. Shyue Ping Ong, Byoungwoo Kang, and Gerbrand Ceder, Li-Fe-P-O<sub>2</sub> Phase Diagram from First Principles Calculations, *Chem. Mater.*, 20 (2008) 1798-1807.
- [6] P. Deák, B. Aradi, T. Frauenheim, Polaronic effects in TiO<sub>2</sub> calculated by the HSE06 hybrid functional: Dopant passivation by carrier self-trapping, *Physical Review B*, 83 (2011).
- [7] A. Urban, D.-H. Seo, G. Ceder, Computational understanding of Li-ion batteries, *npj Computational Materials*, 2 (2016).
- [8] P. Peljo, H.H. Girault, Electrochemical potential window of battery electrolytes: the HOMO-LUMO misconception, *Energy & Environmental Science*, 11 (2018) 2306-2309.
- [9] H. Tang, Z. Deng, Z. Lin, Z. Wang, I.-H. Chu, C. Chen, Z. Zhu, C. Zheng, S.P. Ong, Probing Solid-Solid Interfacial Reactions in All-Solid-State Sodium-Ion Batteries with First-Principles Calculations, *Chemistry of Materials*, 30 (2017) 163-173.
- [10] Z. Deng, Z. Wang, I.-H. Chu, J. Luo, S.P. Ong, Elastic Properties of Alkali Superionic Conductor Electrolytes from First Principles Calculations, *Journal of The Electrochemical Society*, 163 (2015) A67-A74.
- [11] B. Ouyang, Y. Wang, Y. Sun, G. Ceder, Computational Investigation of Halogen-Substituted Na Argyrodites as Solid-State Superionic Conductors, *Chemistry of Materials*, 32 (2020) 1896-1903.
- [12] N.J.J. de Klerk, E. van der Maas, M. Wagemaker, Analysis of Diffusion in Solid-State Electrolytes through MD Simulations, Improvement of the Li-Ion Conductivity in beta-Li<sub>3</sub>PS<sub>4</sub> as an Example, *ACS Appl Energy Mater*, 1 (2018) 3230-3242.
- [13] N.J.J. de Klerk, I. Rosłoń, M. Wagemaker, Diffusion Mechanism of Li Argyrodite Solid Electrolytes for Li-Ion Batteries and Prediction of Optimized Halogen Doping: The Effect of Li Vacancies, Halogens, and Halogen Disorder, *Chemistry of Materials*, 28 (2016) 7955-7963.
- [14] <aesr.202000101.pdf>.
- [15] Z. Zhang, P.N. Roy, H. Li, M. Avdeev, L.F. Nazar, Coupled Cation-Anion Dynamics Enhances Cation Mobility in Room-Temperature Superionic Solid-State Electrolytes, *Journal of the American Chemical Society*, 141 (2019) 19360-19372.
- [16] M. de Jong, W. Chen, T. Angsten, A. Jain, R. Notestine, A. Gamst, M. Sluiter, C. Krishna Ande, S. van der Zwaag, J.J. Plata, C. Toher, S. Curtarolo, G. Ceder, K.A. Persson, M. Asta, Charting the complete elastic properties of inorganic crystalline compounds, *Sci Data*, 2 (2015) 150009.
